# Supplementary material
Source: publisher figshare collection journal article supplement (https://sage.figshare.com/ndownloader/files/25642994)
Supplement: Supplementary file 1 [file 25642994]

Online Supplemental Material for

“A Quiet Revolution in State Lobbying:  
Government Growth and Interest Populations.”

James Strickland

Contents:

- A. Average Interest Groups per Decade
- B. When States Adopted Lobbyist Registration
- C. Comparison of Means Across States
- D. Alternative Model Specifications

## A. Average Interest Groups per Decade

Figure A.1 tracks the average number of groups registered to lobby in Wisconsin and all the remaining states listed in Figure 2 of the main text. Figure A.1 shows that Wisconsin generally bucked the nationwide trend of lobbying growth in the 1960s and 1970s. Figure A.2 tracks the average number of groups registered to lobby in six states with observations available from every decade since the 1910s. The six states include Maryland, Massachusetts, Nebraska, New Hampshire, New York, and South Dakota. The line chart shows that the average number of interest groups began to grow in the 1960s and 1970s, even to the exclusion of totals from New York.

Figure A.1: Average Interest Groups per Decade

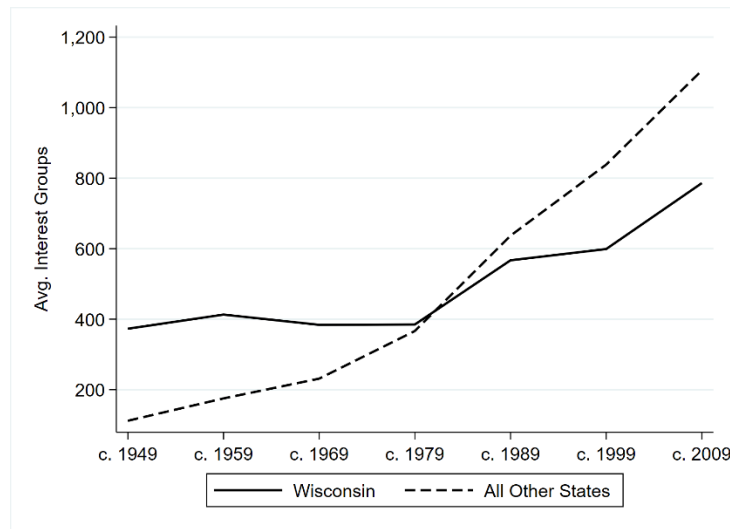

Figure A.2: Average Interest Groups per Decade, Six States

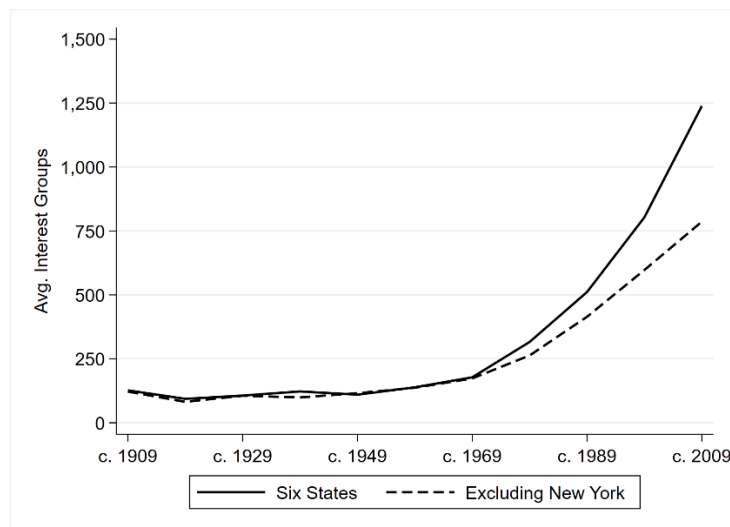

## B. When States Adopted Lobbyist Registration

Table A.1 shows the years when each U.S. state first began to register lobbyists, the method of enactment, and the state entity or agency first delegated with implementing registration. All the initial lobby laws were strengthened over time as states added details and improved enforcement.

Table A.1: Enactment Year of Lobbyist Registration

| State          | Year   | Method of Passage | Delegated Authority              |
|----------------|--------|-------------------|----------------------------------|
| Massachusetts  | 1890   | Legislation       | Sergeant at Arms                 |
| Wisconsin      | 1899   | Legislation       | Secretary of State               |
| Maryland       | 1900   | Legislation       | Secretary of State               |
| New York       | 1906   | Legislation       | Secretary of State               |
| Idaho          | 1907   | Legislation       | Secretary of State               |
| Nebraska       | 1907   | Legislation       | Secretary of State               |
| South Dakota   | 1907   | Legislation       | Secretary of State               |
| Kansas         | 1909   | Legislation       | Secretary of State               |
| New Hampshire  | 1909   | Legislation       | Secretary of State               |
| Georgia        | 1911   | Legislation       | Secretary of State               |
| Rhode Island   | 1912   | Legislation       | Secretary of State               |
| Alaska         | 1913   | Legislation       | Secretary of the Territory       |
| Ohio           | 1913   | Legislation       | Secretary of State               |
| Illinois       | 1915   | Senate Resolution | Secretary of State               |
| Indiana        | 1915   | Legislation       | Secretary of State               |
| Kentucky       | 1916   | Legislation       | Attorney General                 |
| Mississippi    | 1916   | Legislation       | Secretary of State               |
| Maine          | 1919   | Legislation       | Secretary of State               |
| California     | 1925   | Chamber Rule      | Senate Secretary                 |
| North Carolina | 1933   | Legislation       | Secretary of State               |
| South Carolina | 1935   | Legislation       | Secretary of State               |
| Connecticut    | 1936   | Legislation       | Secretary of State               |
| Virginia       | 1938   | Legislation       | Secretary of State               |
| Vermont        | 1939   | Legislation       | Secretary of State               |
| North Dakota   | 1941   | Legislation       | Secretary of State               |
| Colorado       | 1947   | Chamber Rule      | House Clerk                      |
| Florida        | 1947   | Chamber Rule      | House Clerk                      |
| Michigan       | 1947   | Legislation       | Secretary of State               |
| Iowa           | 1949   | Chamber Rule      | House Clerk                      |
| Oklahoma       | 1949   | Chamber Rule      | Senate Secretary                 |
| Texas          | 1949   | Chamber Rule      | House Representation Committee   |
| Montana        | 1959   | Legislation       | Secretary of State               |
| Washington     | 1959   | Chamber Rule      | House Speaker                    |
| Pennsylvania   | 1961   | Legislation       | Secretary of State               |
| Minnesota      | 1963   | Legislation       | House Clerk                      |
| New Jersey     | 1964   | Legislation       | Secretary of State               |
| Missouri       | 1965   | Legislation       | Senate Secretary and House Clerk |
| Tennessee      | 1965   | Legislation       | Secretary of State               |
| Oregon         | 1965   | Legislation       | Legislative Counsel              |
| Arkansas       | 1967   | Legislation       | Senate Secretary and House Clerk |
| New Mexico     | 1967   | Legislation       | Secretary of State               |
| Delaware       | c.1970 | Chamber Rule      | House Clerk                      |
| Arizona        | 1971   | Chamber Rule      | House Rules Committee            |
| Wyoming        | 1971   | Legislation       | Legislative Service Agency       |
| Louisiana      | 1972   | Legislation       | Senate Secretary and House Clerk |
| Alabama        | 1973   | Legislation       | Ethics Commission                |
| Nevada         | 1973   | Legislation       | Secretary of State               |
| West Virginia  | 1974   | Chamber Rule      | Senate Clerk                     |
| Hawai'i        | 1975   | Legislation       | Senate and House Clerks          |
| Utah           | 1975   | Legislation       | Secretary of State               |

### C. Comparison of Means Across States

Along various dimensions, the 30 states I draw observations from are like the remaining non-sampled states. Table A.2 shows the average value for both sampled and non-sampled states for each of my explanatory variables for 2009, the last year included in my data set.<sup>1</sup> The second and third columns report the means of the sampled and non-sampled states, respectively. The fourth column reports the absolute difference along with the results of *t* tests for equality of means. For nearly every variable, I do not find statistically discernible differences in means between sampled and non-sampled states. However, there are discernible differences for session days and for lobby law age. These differences likely do not affect the results presented in the main text. Session length is an inconsistent predictor of interest populations. It is unsurprising that there is a significant difference between the average age of lobby laws in sample states and the average in non-sample states. Non-sample states are mostly late adopters of lobby transparency and therefore are not included in my data set, which examines interest populations dating from the late 1940s. Importantly, the results presented in Table A.2 show that these late adopters do not differ from early adopters (i.e., sampled states) in any meaningful way.

Table A.2: Means of Sample and Non-Sample States, 2009

| Variable                         | Sample States | Non-Sample States | Absolute Difference |
|----------------------------------|---------------|-------------------|---------------------|
| Expenditures ( <i>billions</i> ) | 36.497        | 21.1              | 13.396              |
| Enactments                       | 379.033       | 465.95            | 86.917              |
| Session Length ( <i>days</i> )   | 174.867       | 122.5             | 52.367*             |
| Policy Liberalism                | 0.277         | -0.208            | 0.485               |
| Policy Innovation                | 0.111         | 0.069             | 0.043               |
| Legislative Spending             | 70.483        | 40.668            | 29.815              |
| One-Party Dominance              | 0.513         | 0.534             | 0.021               |
| Lobby Law Age                    | 82.767        | 46.9              | 35.867***           |
| Population ( <i>millions</i> )   | 6.997         | 4.753             | 2.245               |

\* $p < 0.05$ ; \*\*\* $p < 0.001$  on one-tailed tests

---

<sup>1</sup> Observations for Mississippi, Rhode Island, and Virginia are from 2010 since legislatures in these states meet during even-numbered years.

#### D. Alternative Model Specifications

In the main text, regression results are presented using general expenditures that exclude spending on utilities, insurance social trusts, and liquor stores. Table A.3 presents the same model specifications, but with total expenditures that include those missing components. The results all remain substantively unchanged.

Table A.4 presents results from alternative versions of one of the models from the main text, but with a different measure of state spending and a different dependent variable. All four models in Table A.4 use state spending per capita (i.e., billions divided by millions of residents) as an explanatory variable. Since spending is divided by resident population, coefficients for resident population are excluded from the models. Models A.7 and A.8 predict group totals and present negative-binomial coefficients. Models A.9 and A.10 estimate group totals per million residents, and present least-squares coefficients. In models without state and year effects, standard errors are clustered by state. The substantive results presented in Table A.4 remain the same as for other model specifications presented in the main text.

Table A.5 reports the results from models like those presented in the main text. Whereas models in the main text are estimated with state and year effects, the models in Table A.5 include time trends unique to each state. Specifically, unique identifiers for every state (FIPS numbers) are multiplied by years and employed as 29 explanatory variables. The coefficients from these variables are not reported. My main effects all remain substantively the same.

Table A.3: Government Growth and Lobbying by Interest Groups

| VARIABLES                                   | Model A.1            | Model A.2            | Model A.3            | Model A.4            | Model A.5            | Model A.6            |
|---------------------------------------------|----------------------|----------------------|----------------------|----------------------|----------------------|----------------------|
| State Spending ( <i>billions</i> )          | 0.011***<br>(0.003)  | 0.012***<br>(0.003)  | 0.013***<br>(0.003)  | 0.014***<br>(0.003)  | -0.012<br>(0.047)    | 0.006***<br>(0.001)  |
| Enactments / 100                            | 0.0205*<br>(0.012)   | 0.011<br>(0.012)     | 0.013<br>(0.014)     | 0.000<br>(0.015)     | -0.023**<br>(0.01)   | -0.005<br>(0.011)    |
| Session Days / 100                          | 0.140**<br>(0.069)   | 0.078<br>(0.067)     | 0.154**<br>(0.077)   | 0.062<br>(0.075)     | 0.102<br>(0.092)     | -0.01<br>(0.077)     |
| Policy Liberalism                           | -0.088<br>(0.067)    | -0.135**<br>(0.067)  | -0.041<br>(0.074)    | -0.113<br>(0.075)    | -0.457***<br>(0.112) | 0.121**<br>(0.053)   |
| Policy Innovation                           | -0.573*<br>(0.335)   | -0.199<br>(0.26)     | -0.762*<br>(0.4)     | -0.193<br>(0.296)    | 0.183<br>(0.814)     | -0.464***<br>(0.179) |
| One-Party Dominance                         | 0.963***<br>(0.285)  | -                    | 1.282***<br>(0.319)  | -                    | 1.558***<br>(0.282)  | 0.215<br>(0.208)     |
| State Spending ( <i>billions</i> )          | 0.011***<br>(0.003)  | 0.012***<br>(0.003)  | 0.013***<br>(0.003)  | 0.014***<br>(0.003)  | -0.012<br>(0.047)    | 0.006***<br>(0.001)  |
| Legis. Spending ( <i>millions</i> )         | -0.757***<br>(0.275) | -0.735***<br>(0.276) | -1.305***<br>(0.429) | -1.162***<br>(0.427) | 0.822<br>(2.467)     | -0.698***<br>(0.169) |
| Age of First Lobby Law                      | -0.005<br>(0.035)    | 0.015<br>(0.035)     | -0.008<br>(0.039)    | 0.024<br>(0.04)      | -0.031<br>(0.39)     | 0.003<br>(0.019)     |
| Revised Lobby Law                           | 0.322***<br>(0.114)  | 0.324***<br>(0.112)  | 0.36***<br>(0.13)    | 0.383***<br>(0.131)  | -                    | -                    |
| Population ( <i>millions</i> )              | 0.139***<br>(0.037)  | 0.146***<br>(0.038)  | 0.126***<br>(0.039)  | 0.135***<br>(0.041)  | 0.166**<br>(0.082)   | 0.143***<br>(0.036)  |
| Population <sup>2</sup> ( <i>millions</i> ) | -0.002**<br>(0.001)  | -0.002**<br>(0.001)  | -0.001<br>(0.001)    | -0.002<br>(0.001)    | 0.004<br>(0.004)     | -0.002*<br>(0.001)   |
| Ln( $\alpha$ )                              | -2.596***<br>(0.119) | -2.546***<br>(0.117) | -2.55***<br>(0.135)  | -2.443***<br>(0.13)  | -5.306***<br>(0.384) | -4.187***<br>(0.145) |
| Constant                                    | 3.618***<br>(1.224)  | 3.751***<br>(1.24)   | 2.431**<br>(1.085)   | 3.127***<br>(1.132)  | 4.085<br>(14.23)     | 5.206***<br>(0.709)  |
| <i>Observations</i>                         | 197                  | 204                  | 161                  | 168                  | 79                   | 118                  |
| <i>No. of States</i>                        | 29                   | 30                   | 23                   | 24                   | 26                   | 27                   |
| <i>Years Covered</i>                        | 1949-2010            | 1949-2010            | 1949-2010            | 1949-2010            | 1949-1990            | 1951-2010            |
| <i>Log Likelihood</i>                       | -1182.378            | -1226.642            | -959.063             | -1006.353            | -321.91              | -674.692             |
| <i>AIC</i>                                  | 2504.756             | 2593.284             | 2044.125             | 2138.706             | 757.82               | 1467.383             |

Note: coefficients are negative binomial coefficients. State and year effects included in all models but not reported.

Standard errors are in parentheses. \*\*\*  $p < 0.01$ , \*\*  $p < 0.05$ , \*  $p < 0.1$

Table A.4: Alternative Measures of Government Spending

| VARIABLES                           | Model A.7<br>Groups | Model A.8<br>Groups  | Model A.9<br>Groups per capita | Model A.10<br>Groups per capita |
|-------------------------------------|---------------------|----------------------|--------------------------------|---------------------------------|
| Enactments / 100                    | 0.018<br>(0.014)    | -0.019<br>(0.015)    | -4.487*<br>(2.423)             | 2.015<br>(1.912)                |
| Session Days / 100                  | 0.054<br>(0.099)    | 0.132*<br>(0.08)     | -39.70**<br>(15.64)            | -20*<br>(10.34)                 |
| Policy Liberalism                   | -0.077<br>(0.119)   | -0.112<br>(0.094)    | 20.84<br>(14.67)               | -1.232<br>(12.02)               |
| Policy Innovation                   | -0.635**<br>(0.314) | -0.618*<br>(0.317)   | -63.86<br>(86.97)              | -33.93<br>(43.96)               |
| State Spending per capita           | 0.143***<br>(0.048) | -0.064<br>(0.088)    | 43.81***<br>(13.53)            | 41.95***<br>(11.72)             |
| Legis. Spending ( <i>millions</i> ) | 1.262**<br>(0.606)  | 0.271*<br>(0.163)    | -131.4***<br>(44.20)           | -65.75***<br>(21.21)            |
| Age of First Lobby Law              | -0.001<br>(0.005)   | -0.028<br>(0.042)    | -1.005<br>(1.096)              | -0.09<br>(5.494)                |
| Revised Lobby Law                   | 0.757***<br>(0.116) | 0.405***<br>(0.143)  | 71.50***<br>(25.18)            | 32.91*<br>(18.90)               |
| Ln( $\alpha$ )                      | -0.956<br>(0.307)   | -2.251***<br>(1.023) | -                              | -                               |
| Constant                            | 4.858***<br>(0.354) | 6.209***<br>(1.023)  | 189.7***<br>(53.34)            | 8.453<br>(133)                  |
| <i>Fixed Effects?</i>               | No                  | Yes                  | No                             | Yes                             |
| <i>Observations</i>                 | 168                 | 168                  | 168                            | 168                             |
| <i>No. of States</i>                | 24                  | 24                   | 24                             | 24                              |
| <i>Years Covered</i>                | 1949-2010           | 1949-2010            | 1949-2010                      | 1949-2010                       |
| <i>Log Likelihood</i>               | -1119.077           | -1018.973            | -                              | -                               |
| <i>AIC</i>                          | 2258.154            | 2159.946             | -                              | -                               |
| <i>R-squared</i>                    | -                   | -                    | 0.468                          | 0.924                           |

Note: coefficients for models A.7 and A.8 are negative binomial coefficients. Standard errors are in parentheses. \*\*\*  $p < 0.01$ , \*\*  $p < 0.05$ , \*  $p < 0.1$

Table A.5: Government Growth and Lobbying by Groups (Alternative Specification)

| VARIABLES                                   | Model A.11           | Model A.12           | Model A.13          | Model A.14           | Model A.15          | Model A.16           |
|---------------------------------------------|----------------------|----------------------|---------------------|----------------------|---------------------|----------------------|
| Enactments / 100                            | 0.02*<br>(0.012)     | 0.014<br>(0.012)     | 0.011<br>(0.013)    | 0.004<br>(0.014)     | -0.012<br>(0.014)   | -0.013<br>(0.013)    |
| Session Days / 100                          | 0.089<br>(0.067)     | 0.047<br>(0.066)     | 0.075<br>(0.073)    | 0.02<br>(0.073)      | -0.025<br>(0.092)   | -0.005<br>(0.078)    |
| Policy Liberalism                           | -0.086<br>(0.073)    | -0.132*<br>(0.074)   | -0.064<br>(0.079)   | -0.121<br>(0.081)    | -0.279**<br>(0.124) | 0.114<br>(0.072)     |
| Policy Innovation                           | -0.356<br>(0.35)     | -0.264<br>(0.282)    | -0.478<br>(0.418)   | -0.29<br>(0.318)     | 1.450*<br>(0.836)   | -0.287<br>(0.234)    |
| One-Party Dominance                         | 1.080***<br>(0.273)  | -                    | 1.206***<br>(0.305) | -                    | 0.754**<br>(0.337)  | 0.395<br>(0.244)     |
| State Spending ( <i>billions</i> )          | 0.014***<br>(0.003)  | 0.013***<br>(0.003)  | 0.016***<br>(0.004) | 0.015***<br>(0.004)  | 0.076<br>(0.068)    | 0.008***<br>(0.002)  |
| Legis. Spending ( <i>millions</i> )         | -0.449<br>(0.299)    | -0.527*<br>(0.302)   | -0.730<br>(0.457)   | -0.744*<br>(0.449)   | 1.325<br>(3.098)    | -0.488**<br>(0.227)  |
| Age of First Lobby Law                      | -0.006<br>(0.032)    | 0.005<br>(0.033)     | 0.009<br>(0.036)    | 0.026<br>(0.037)     | -0.071<br>(0.178)   | 0.004<br>(0.021)     |
| Revised Lobby Law                           | 0.466***<br>(0.095)  | 0.426***<br>(0.096)  | 0.5***<br>(0.108)   | 0.46***<br>(0.11)    | -                   | -                    |
| Population ( <i>millions</i> )              | 0.104***<br>(0.039)  | 0.125***<br>(0.04)   | 0.089**<br>(0.041)  | 0.112***<br>(0.042)  | 0.092<br>(0.105)    | 0.108**<br>(0.046)   |
| Population <sup>2</sup> ( <i>millions</i> ) | -0.002**<br>(0.001)  | -0.002**<br>(0.001)  | -0.002<br>(0.001)   | -0.002*<br>(0.001)   | -0.003<br>(0.006)   | -0.002*<br>(0.001)   |
| Ln( $\alpha$ )                              | -2.346***<br>(0.116) | -2.284***<br>(0.113) | -2.282***<br>(0.13) | -2.204***<br>(0.126) | -3.76***<br>(0.212) | -3.484***<br>(0.139) |
| Constant                                    | -46.85<br>(61.28)    | -31.33<br>(62.63)    | -18.93<br>(68.63)   | 6.712<br>(71.01)     | -154.1<br>(341.3)   | -32.87<br>(41.07)    |
| <i>Observations</i>                         | 197                  | 204                  | 161                 | 168                  | 79                  | 118                  |
| <i>No. of States</i>                        | 29                   | 30                   | 23                  | 24                   | 26                  | 27                   |
| <i>Years Covered</i>                        | 1949-2010            | 1949-2010            | 1949-2010           | 1949-2010            | 1949-1990           | 1951-2010            |
| <i>Log Likelihood</i>                       | -1202.409            | -1248.652            | -976.199            | -1022.634            | -357.145            | -713.817             |
| <i>AIC</i>                                  | 2488.818             | 2581.304             | 2024.398            | 2117.269             | 792.289             | 1509.634             |

Note: coefficients are negative binomial coefficients. Standard errors are in parentheses.

\*\*\*  $p < 0.01$ , \*\*  $p < 0.05$ , \*  $p < 0.1$
